# Supplementary material
Source: PubMed Central journal article supplement (PMC4346443)
Supplement: NIHMS639650-supplement-01.pdf [file NIHMS639650-supplement-01.pdf]

## **Supplemental Figure Legends**

Figure S1.

Heading: Patient flow chart

Figure S2.

Heading: Confounder-outcome relative risk required to produce observed treatment effects.

Legend: AOR = 1.30 for treated chronic hypertension, AOR = 1.22 for untreated chronic hypertension. The prevalence of the hypothetical confounder (“C”) in the unexposed population is 5%. AOR indicates adjusted odds ratio.

Figure 1. Patient flow chart

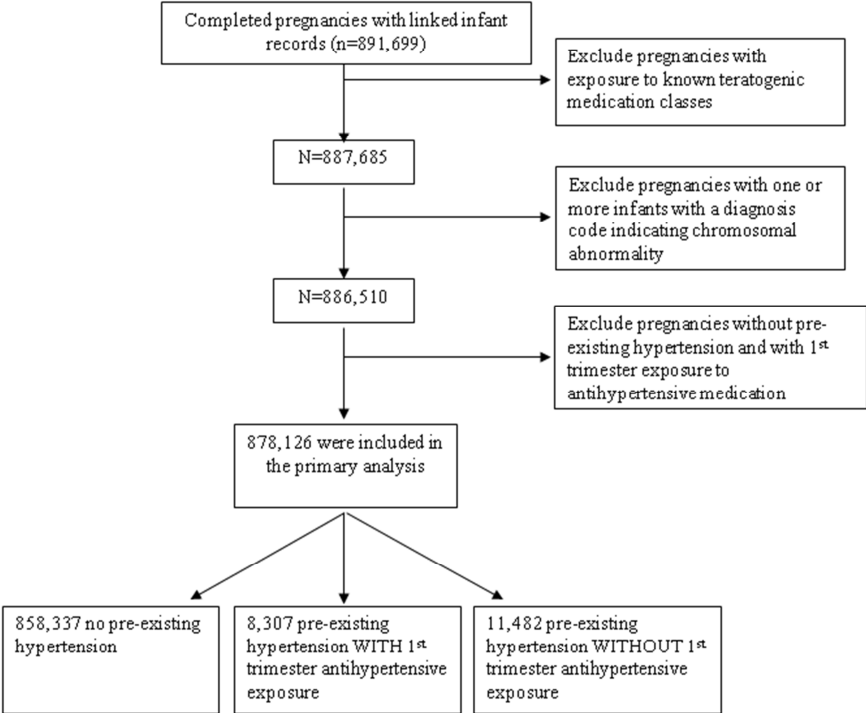

Confounder-outcome RR required to produce observed treatment effects

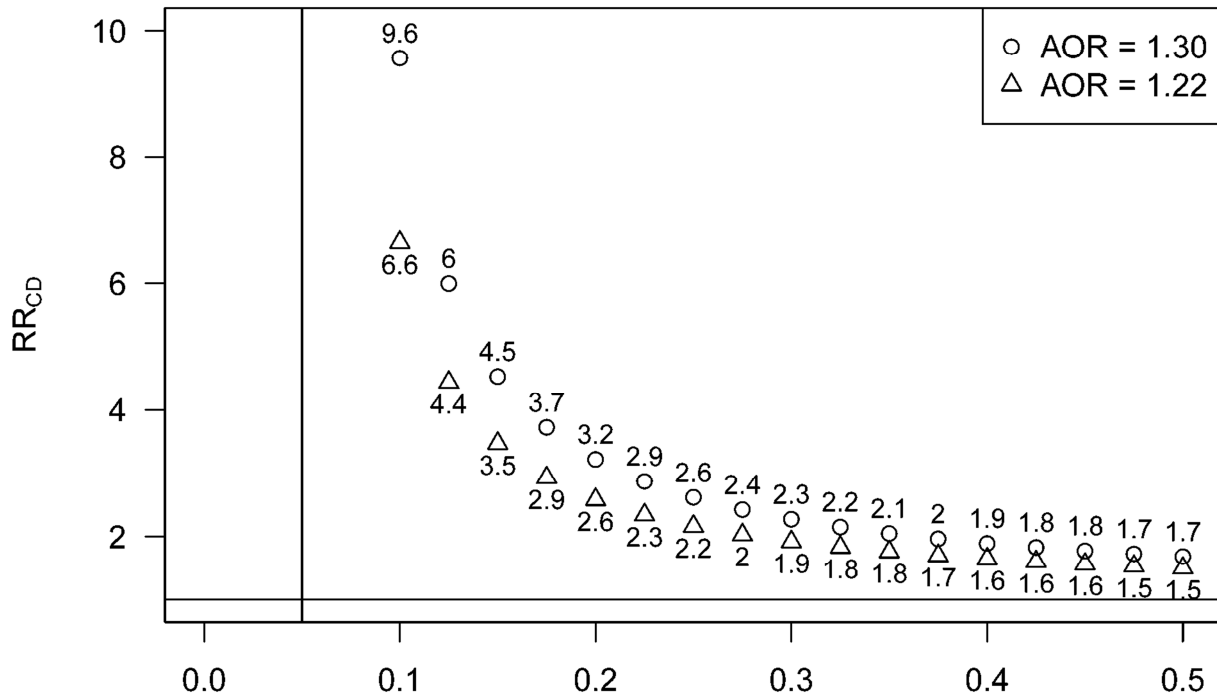

Prevalence of C among exposed  
 Prevalence of C among unexposed = 0.05
